# Supplementary material for: Polydopamine-Coated Polycaprolactone Electrospun Nanofiber Membrane Loaded with Thrombin for Wound Hemostasis
Source: MDPI journal article supplement (doi:10.3390/polym15143122), 2023-07-22
Supplement: s1 [file s1]

## Supplementary Materials

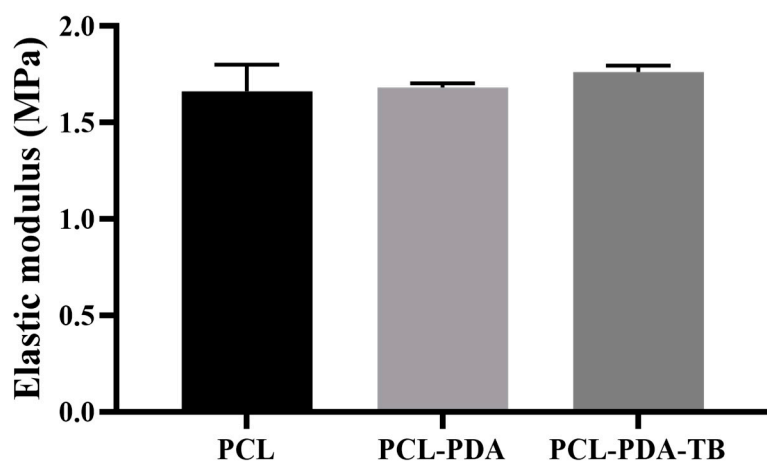

**Figure S1.** Elastic modulus of PCL, PCL-PDA and PCL-PDA-TB fibrous membranes.(n=3)

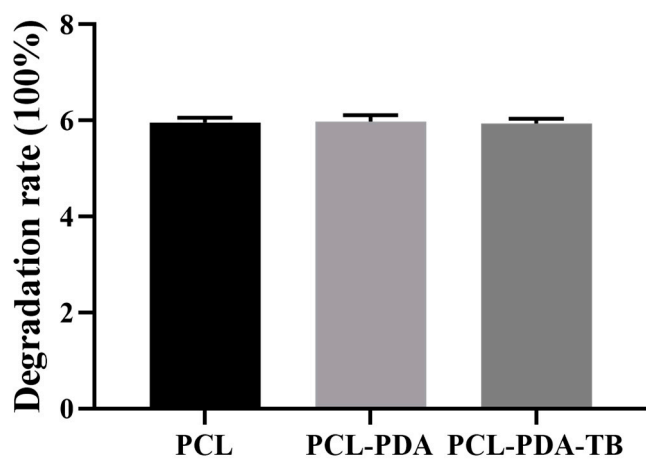

**Figure S2.** Degradation rate of PCL, PCL-PDA and PCL-PDA-TB fibrous membranes.(n=3)

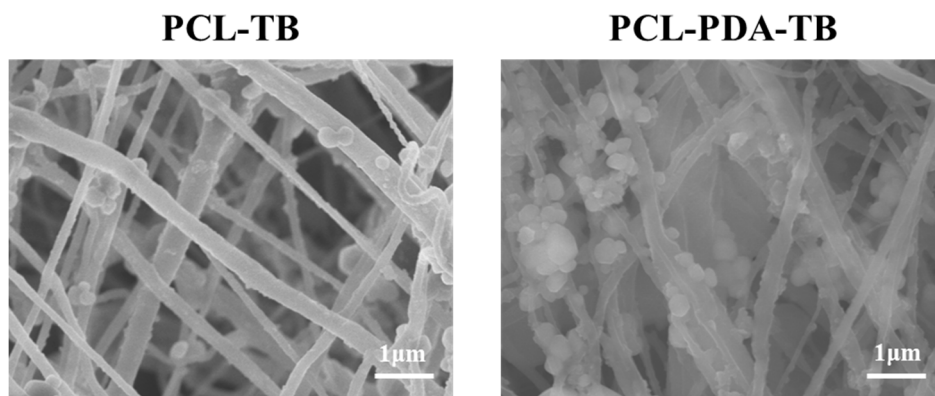

**Figure S3.** SEM images of Thrombin loaded onto PCL and PCL-PDA fibrous membranes.

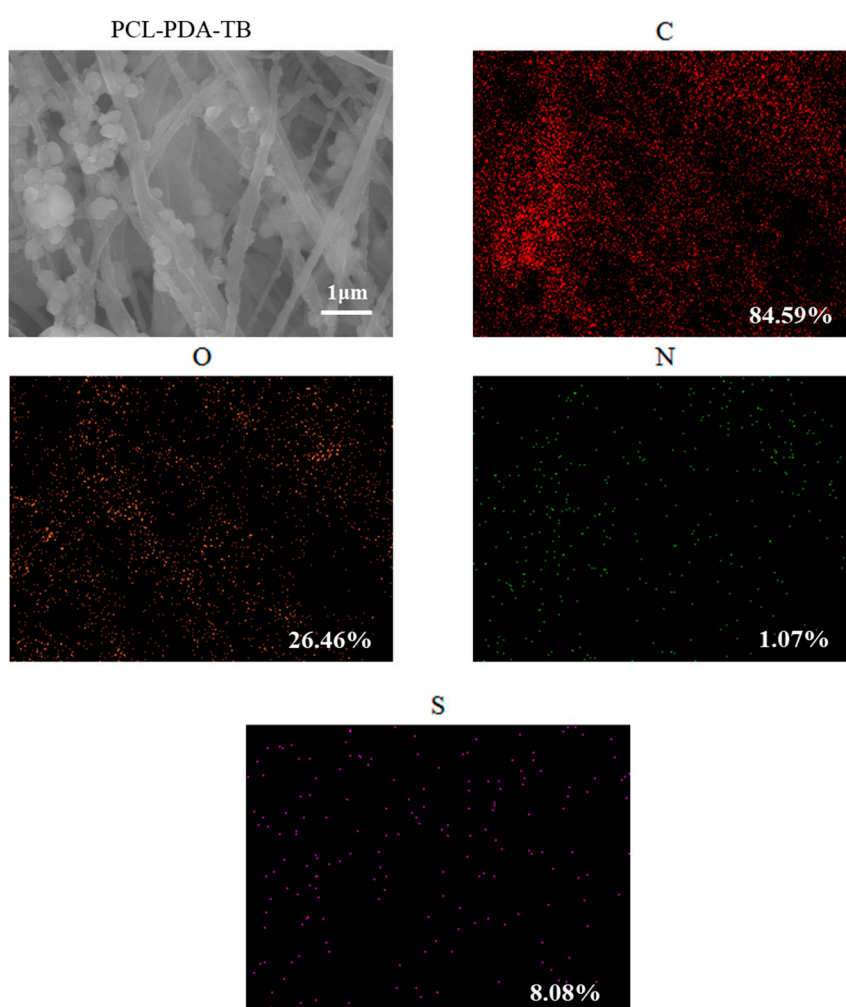

**Figure S4.** SEM and EDS elemental mapping images of PCL-PDA-TB fibrous membranes.
